# Supplementary material for: Simultaneous Conduction and Valence Band Regulation of Indium-Based Quantum Dots for Efficient H2 Photogeneration
Source: MDPI journal article supplement (doi:10.3390/nano11051115), 2021-04-26
Supplement: s1 [file s1]

## Supplemental Information

# Simultaneous Conduction and Valence Band Regulation of Indium-Based Quantum Dots for Efficient H<sub>2</sub> Photogeneration

Xiu-Ping Li <sup>†</sup>, Rong-Jin Huang <sup>†</sup>, Cong Chen, Tianduo Li and Yu-Ji Gao <sup>\*</sup>

Shandong Provincial Key Laboratory of Molecular Engineering, School of Chemistry and Chemical Engineering, Qilu University of Technology (Shandong Academy of Science), Jinan 250353, China; lixp2021@163.com (X.-P.L.); huangrongjin2021@163.com (R.-J.H.); chencong199889@163.com (C.C.); ylp6296@vip.163.com (T.L.)

<sup>\*</sup> Correspondence: yjgao@qlu.edu.cn

<sup>†</sup> These authors contributed equally to this work.

## 1. Table S1

**Table S1.** Comparison of photocatalytic H<sub>2</sub> evolution with reported cadmium chalcogenide QDs-based systems.

| Photocatalysts                                            | Cocatalysts               | Light Source | Donor                           | TON vs. QD | Time (h) | Refer.    |
|-----------------------------------------------------------|---------------------------|--------------|---------------------------------|------------|----------|-----------|
| <b>CdTe QDs</b>                                           | [FeFe]-H <sub>2</sub> ase | >420 nm      | H <sub>2</sub> A                | 157.6      | 10       | [1]       |
| <b>CdSe QDs</b>                                           | [FeFe]-H <sub>2</sub> ase | >400 nm      | H <sub>2</sub> A                | 3 206      | 80       | [2]       |
| <b>CdSe QDs</b>                                           | Ni-DHLA                   | 520 nm       | H <sub>2</sub> A                | 1 200 000  | 360      | [3]       |
| <b>CdTe QDs</b>                                           | Co <sup>2+</sup>          | >400 nm      | H <sub>2</sub> A                | 219 100    | 70       | [4]       |
| <b>CdSe QDs</b>                                           | Ni <sup>2+</sup>          | >400 nm      | IPA                             | 15 340     | 20       | [5]       |
| <b>CdS QDs</b>                                            | Co <sup>2+</sup>          | >420 nm      | Na <sub>2</sub> SO <sub>3</sub> | 29 000     | 88       | [6]       |
| <b>CdSe/ZnS QDs</b>                                       | Cobaloxime                | >400 nm      | TEOA                            | >10 000    | 10       | [7]       |
| <b>CdS QDs</b>                                            | Ni <sup>2+</sup>          | >400 nm      | glycerol                        | 38 405     | 20       | [8]       |
| <b>ZnS modified CdSe QDs</b>                              | None                      | 450 nm       | H <sub>2</sub> A                | 440 000    | 40       | [9]       |
| <b>CdSe QDs</b>                                           | ZnSe                      | >400 nm      | H <sub>2</sub> A                | ~5000      | 12       | [10]      |
| <b>CdSe/Zn<sub>1-x</sub>Fe<sub>x</sub>S QDs</b>           | FeS                       | 405 nm       | TEA                             | 600 000    | 172 h    | [11]      |
| <b>Cu<sub>0.4</sub>-ZnIn<sub>2</sub>S<sub>4</sub> QDs</b> | Ni <sup>2+</sup>          | 460 nm       | H <sub>2</sub> A                | 20 260     | 16 h     | This work |

## 2. Figure S1

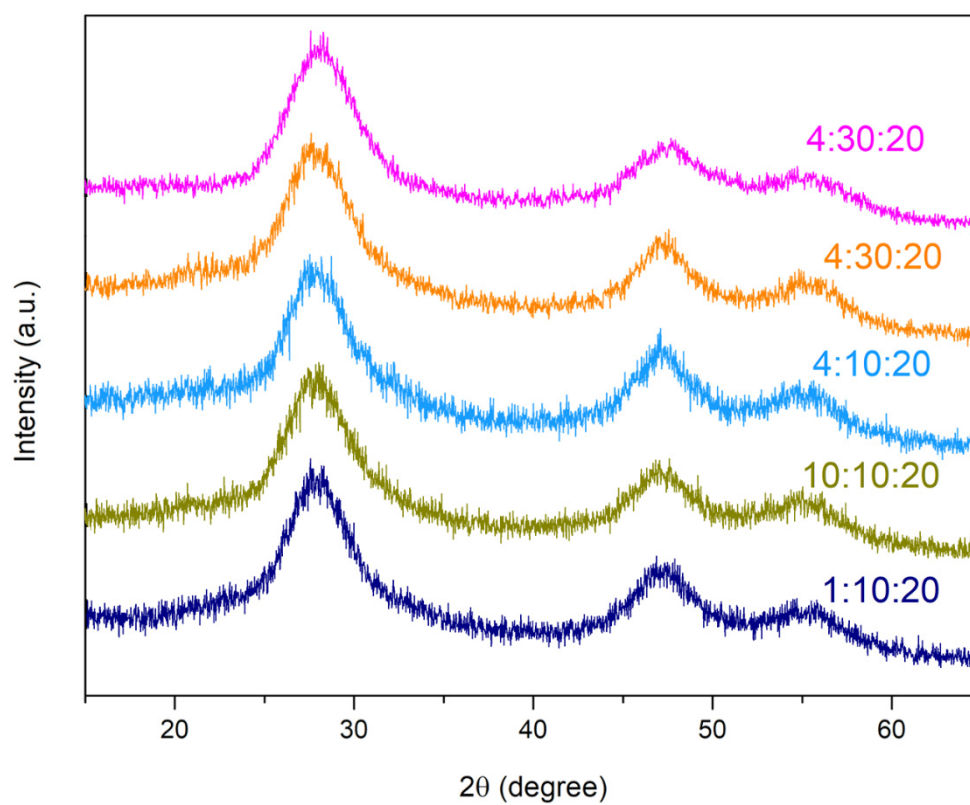

**Figure S1.** The XRD patterns of Cu-doped Zn-In-S QDs (The ratio in the graph represents the molar ratio of Cu:Zn:In).

### 3. Figure S2

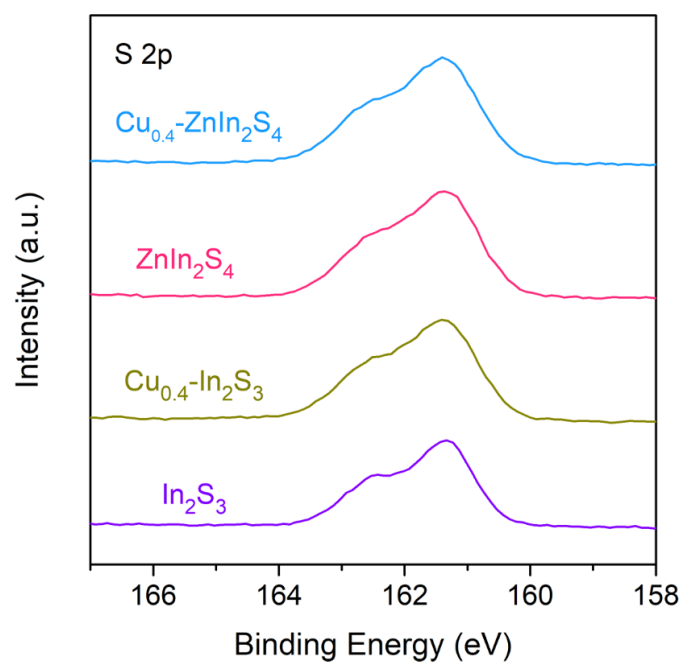

**Figure S2.** The high-resolution XPS spectra of S 2p of  $\text{In}_2\text{S}_3$ ,  $\text{Cu}_{0.4}\text{-In}_2\text{S}_3$ ,  $\text{ZnIn}_2\text{S}_4$  and  $\text{Cu}_{0.4}\text{-ZnIn}_2\text{S}_4$  QDs.

#### 4. Figure S3

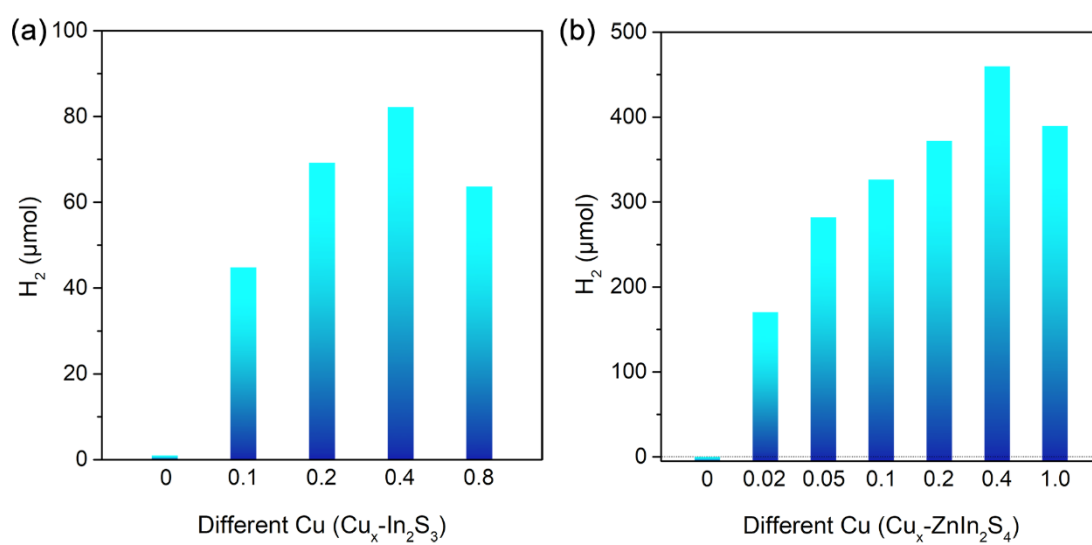

**Figure S3.** The photocatalytic  $H_2$  evolution comparison of different contents of Cu doped (a)  $\text{In}_2\text{S}_3$  and (b)  $\text{ZnIn}_2\text{S}_4$  QDs.

## 5. Reference

1. Wang, F.; Wang, W.-G.; Wang, X.-J.; Wang, H.-Y.; Tung, C.-H.; Wu, L.-Z., A Highly Efficient Photocatalytic System for Hydrogen Production by a Robust Hydrogenase Mimic in an Aqueous Solution. *Angew. Chem. Int. Ed.* **2011**, *50*, 3193-3197.
2. Li, C.-B.; Li, Z.-J.; Yu, S.; Wang, G.-X.; Wang, F.; Meng, Q.-Y.; Chen, B.; Feng, K.; Tung, C.-H.; Wu, L.-Z., Interface-directed assembly of a simple precursor of [FeFe]-H<sub>2</sub>ase mimics on CdSe QDs for photosynthetic hydrogen evolution in water. *Energy Environ. Sci.* **2013**, *6*, 2597-2602.
3. Han, Z.; Qiu, F.; Eisenberg, R.; Holland, P. L.; Krauss, T. D., Robust Photogeneration of H<sub>2</sub> in Water Using Semiconductor Nanocrystals and a Nickel Catalyst. *Science* **2012**, *338*, 1321-1324.
4. Li, Z.-J.; Li, X.-B.; Wang, J.-J.; Yu, S.; Li, C.-B.; Tung, C.-H.; Wu, L.-Z., A robust "artificial catalyst" in situ formed from CdTe QDs and inorganic cobalt salts for photocatalytic hydrogen evolution. *Energy Environ. Sci.* **2013**, *6*, 465-469.
5. Li, Z.-J.; Wang, J.-J.; Li, X.-B.; Fan, X.-B.; Meng, Q.-Y.; Feng, K.; Chen, B.; Tung, C.-H.; Wu, L.-Z., An exceptional artificial photocatalyst, Ni<sub>4</sub>-CdSe/CdS core/shell hybrid, made in situ from CdSe quantum dots and nickel salts for efficient hydrogen evolution. *Adv. Mater.* **2013**, *25*, 6613-6618.
6. Chang, C. M.; Orchard, K. L.; Martindale, B. C. M.; Reisner, E., Ligand removal from CdS quantum dots for enhanced photocatalytic H<sub>2</sub> generation in pH neutral water. *J. Mater. Chem. A* **2016**, *4*, 2856-2862.
7. Huang, J.; Mulfort, K. L.; Du, P.; Chen, L. X., Photodriven charge separation dynamics in CdSe/ZnS core/shell quantum dot/cobaloxime hybrid for efficient hydrogen production. *J. Am. Chem. Soc.* **2012**, *134*, 16472-16475.
8. Wang, J.-J.; Li, Z.-J.; Li, X.-B.; Fan, X.-B.; Meng, Q.-Y.; Yu, S.; Li, C.-B.; Li, J.-X.; Tung, C.-H.; Wu, L.-Z., Photocatalytic hydrogen evolution from glycerol and water over nickel-hybrid cadmium sulfide quantum dots under visible-light irradiation. *ChemSusChem* **2014**, *7*, 1468-1475.
9. Gao, Y.-J.; Li, X.-B.; Wu, H.-L.; Meng, S.-L.; Fan, X.-B.; Huang, M.-Y.; Guo, Q.; Tung, C.-H.; Wu, L.-Z., Exceptional Catalytic Nature of Quantum Dots for Photocatalytic Hydrogen Evolution without External Cocatalysts. *Adv. Funct. Mater.* **2018**, *28*, 1801769.
10. Gao, Y.-J.; Yang, Y.; Li, X.-B.; Wu, H.-L.; Meng, S.-L.; Wang, Y.; Guo, Q.; Huang, M.-Y.; Tung, C.-H.; Wu, L.-Z., Self-assembled inorganic clusters of semiconducting quantum dots for effective solar hydrogen evolution. *Chem. Commun.* **2018**, *54*, 4858-4861.
11. Gao, Y.-J.; Li, X.-B.; Wang, X.-Z.; Zhao, N.-J.; Zhao, Y.; Wang, Y.; Xin, Z.-K.; Zhang, J.-P.; Zhang, T.; Tung, C.-H.; Wu, L.-Z., Site- and Spatial-Selective Integration of Non-noble Metal Ions into Quantum Dots for Robust Hydrogen Photogeneration. *Matter* **2020**, *3*, 571-585.
